# Supplementary material
Source: Springer Nature journal article supplement (https://www.springermedizin.de/resource/supplementary/12889_2014_7042_MOESM1_ESM.pdf/9499600)

Men

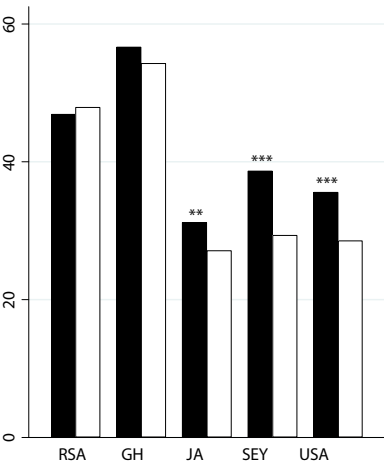

Women

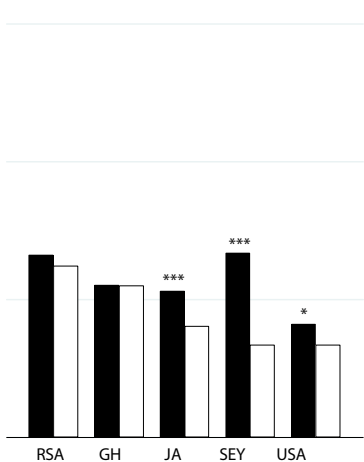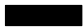

Weekday MVPA (min/d)

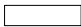

Weekend day MVPA (min/d)

Supplement: MOESM1 [file 9499600]
